# Supplementary material for: Microbiome–host systems interactions: protective effects of propionate upon the blood–brain barrier
Source: Springer Nature journal article supplement (doi:10.1186/s40168-018-0439-y), 2018-03-21
Supplement: MOESM1 [file 40168_2018_439_MOESM1_ESM.pdf]

## Cell Adhesion/Junctional proteins/Cytoskeletal factors

| Symbol        | Description                                                                                       | logFC         | adj.P.Val    |
|---------------|---------------------------------------------------------------------------------------------------|---------------|--------------|
| <b>PECAM1</b> | <b>platelet and endothelial cell adhesion molecule 1</b>                                          | <b>-0.518</b> | <b>0.002</b> |
| <b>CLDN11</b> | <b>claudin 11</b>                                                                                 | <b>0.541</b>  | <b>0.024</b> |
| GJA1          | gap junction protein alpha 1                                                                      | 0.434         | 0.055        |
| CLDN1         | claudin 1                                                                                         | 0.264         | 0.062        |
| JAM3          | junctional adhesion molecule 3                                                                    | 0.180         | 0.132        |
| UTRN          | utrophin                                                                                          | -0.155        | 0.157        |
| CDH2          | cadherin 2                                                                                        | 0.167         | 0.184        |
| CLDN7         | claudin 7                                                                                         | -0.122        | 0.270        |
| ANXA1         | annexin A1                                                                                        | 0.145         | 0.270        |
| TJP2          | tight junction protein 2                                                                          | -0.124        | 0.281        |
| CLDN17        | claudin 17                                                                                        | -0.124        | 0.282        |
| CLDN4         | claudin 4                                                                                         | 0.141         | 0.341        |
| SMARCA2       | SWI/SNF related, matrix associated, actin dependent regulator of chromatin, subfamily a, member 2 | 0.118         | 0.373        |
| CLDN23        | claudin 23                                                                                        | -0.108        | 0.462        |
| JAM2          | junctional adhesion molecule 2                                                                    | -0.110        | 0.540        |
| TJP1          | tight junction protein 1                                                                          | 0.090         | 0.573        |
| CLDN6         | claudin 6                                                                                         | 0.092         | 0.582        |
| LAMA4         | laminin subunit alpha 4                                                                           | -0.078        | 0.629        |
| LAMA3         | laminin subunit alpha 3                                                                           | -0.070        | 0.657        |
| DAG1          | dystroglycan 1                                                                                    | -0.067        | 0.663        |
| CLDN20        | claudin 20                                                                                        | 0.073         | 0.666        |
| AGRN          | agrin                                                                                             | 0.055         | 0.694        |
| CLDN12        | claudin 12                                                                                        | 0.064         | 0.751        |
| CLDN8         | claudin 8                                                                                         | -0.049        | 0.753        |
| CLDN15        | claudin 15                                                                                        | -0.050        | 0.778        |
| CTNNB1        | catenin beta 1                                                                                    | -0.047        | 0.783        |
| VIM           | vimentin                                                                                          | 0.041         | 0.792        |
| HAPLN2        | hyaluronan and proteoglycan link protein 2                                                        | -0.054        | 0.794        |
| DTNA          | dystrobrevin alpha                                                                                | 0.053         | 0.796        |
| ESAM          | endothelial cell adhesion molecule                                                                | -0.043        | 0.799        |
| LAMB2         | laminin subunit beta 2                                                                            | -0.044        | 0.803        |
| CLDN9         | claudin 9                                                                                         | -0.039        | 0.804        |
| LAMA2         | laminin subunit alpha 2                                                                           | -0.057        | 0.808        |
| ITM2A         | integral membrane protein 2A                                                                      | -0.041        | 0.837        |
| FN1           | fibronectin 1                                                                                     | -0.037        | 0.852        |
| COL4A1        | collagen type IV alpha 1 chain                                                                    | 0.030         | 0.875        |
| TJP3          | tight junction protein 3                                                                          | -0.027        | 0.894        |
| CLDN3         | claudin 3                                                                                         | -0.023        | 0.906        |
| GJB6          | gap junction protein beta 6                                                                       | 0.022         | 0.911        |
| CDH5          | cadherin 5                                                                                        | -0.029        | 0.920        |
| LAMA1         | laminin subunit alpha 1                                                                           | 0.014         | 0.948        |
| CLDN5         | claudin 5                                                                                         | -0.016        | 0.962        |
| CLDN22        | claudin 22                                                                                        | 0.013         | 0.963        |
| ACTB          | actin beta                                                                                        | 0.009         | 0.965        |
| CLDN10        | claudin 10                                                                                        | -0.009        | 0.966        |
| ADGRA2        | adhesion G protein-coupled receptor A2                                                            | 0.010         | 0.966        |
| ITGA3         | integrin subunit alpha 3                                                                          | -0.009        | 0.967        |

|          |                                            |        |       |
|----------|--------------------------------------------|--------|-------|
| OCLN     | occludin                                   | -0.007 | 0.969 |
| HSPG2    | heparan sulfate proteoglycan 2             | 0.008  | 0.973 |
| DMD      | dystrophin                                 | -0.003 | 0.989 |
| AFDN     | afadin, adherens junction formation factor | 0.003  | 0.989 |
| MARVELD2 | MARVEL domain containing 2                 | -0.001 | 0.996 |

#### Transporter proteins

| <u>Symbol</u>  | <u>Description</u>                                             | <u>logFC</u>  | <u>adj.P.Val</u> |
|----------------|----------------------------------------------------------------|---------------|------------------|
| <b>SLC1A5</b>  | <b>solute carrier family 1 member 5</b>                        | <b>0.400</b>  | <b>0.011</b>     |
| <b>SLC44A1</b> | <b>solute carrier family 44 member 1</b>                       | <b>-0.261</b> | <b>0.030</b>     |
| SLC7A5         | solute carrier family 7 member 5                               | 0.206         | 0.092            |
| TFRC           | transferrin receptor                                           | 0.262         | 0.099            |
| SLC38A5        | solute carrier family 38 member 5                              | 0.194         | 0.165            |
| SLC38A3        | solute carrier family 38 member 3                              | 0.140         | 0.240            |
| SLC22A5        | solute carrier family 22 member 5                              | 0.140         | 0.272            |
| SLC29A4        | solute carrier family 29 member 4                              | 0.144         | 0.299            |
| SLC22A8        | solute carrier family 22 member 8                              | -0.126        | 0.308            |
| SLC2A1         | solute carrier family 2 member 1                               | -0.129        | 0.342            |
| SLC38A2        | solute carrier family 38 member 2                              | 0.120         | 0.381            |
| SLC28A2        | solute carrier family 28 member 2                              | 0.133         | 0.411            |
| SLC5A1         | solute carrier family 5 member 1                               | 0.100         | 0.447            |
| SLC5A6         | solute carrier family 5 member 6                               | 0.094         | 0.452            |
| SLC6A6         | solute carrier family 6 member 6                               | 0.096         | 0.461            |
| SLC1A4         | solute carrier family 1 member 4                               | -0.115        | 0.462            |
| SLC27A4        | solute carrier family 27 member 4                              | -0.139        | 0.463            |
| LRP2           | LDL receptor related protein 2                                 | 0.082         | 0.501            |
| SLC38A1        | solute carrier family 38 member 1                              | 0.091         | 0.510            |
| SLC22A1        | solute carrier family 22 member 1                              | 0.078         | 0.560            |
| LDLR           | low density lipoprotein receptor                               | -0.075        | 0.566            |
| SLC1A3         | solute carrier family 1 member 3                               | 0.084         | 0.581            |
| MFSD2A         | major facilitator superfamily domain containing 2A             | 0.079         | 0.593            |
| ABCG2          | ATP binding cassette subfamily G member 2 (Junior blood group) | 0.066         | 0.671            |
| INSR           | insulin receptor                                               | 0.060         | 0.718            |
| AQP4           | aquaporin 4                                                    | 0.060         | 0.733            |
| SLC16A2        | solute carrier family 16 member 2                              | -0.057        | 0.780            |
| ABCC5          | ATP binding cassette subfamily C member 5                      | -0.041        | 0.793            |
| SLCO1C1        | solute carrier organic anion transporter family member 1C1     | 0.041         | 0.795            |
| SLC29A1        | solute carrier family 29 member 1 (Augustine blood group)      | 0.036         | 0.807            |
| SLC27A1        | solute carrier family 27 member 1                              | -0.036        | 0.818            |
| SLC7A3         | solute carrier family 7 member 3                               | 0.038         | 0.824            |
| SLC22A2        | solute carrier family 22 member 2                              | 0.035         | 0.843            |
| SLC16A1        | solute carrier family 16 member 1                              | -0.047        | 0.847            |
| ABCB1          | ATP binding cassette subfamily B member 1                      | 0.029         | 0.866            |
| AGER           | advanced glycosylation end-product specific receptor           | -0.026        | 0.908            |
| AVPR1A         | arginine vasopressin receptor 1A                               | -0.023        | 0.912            |
| ABCA2          | ATP binding cassette subfamily A member 2                      | 0.015         | 0.947            |
| SLC6A9         | solute carrier family 6 member 9                               | 0.013         | 0.949            |
| SLC1A1         | solute carrier family 1 member 1                               | -0.013        | 0.954            |
| SLC7A1         | solute carrier family 7 member 1                               | 0.013         | 0.955            |
| ABCC1          | ATP binding cassette subfamily C member 1                      | 0.012         | 0.956            |

|         |                                                            |        |       |
|---------|------------------------------------------------------------|--------|-------|
| SLC22A3 | solute carrier family 22 member 3                          | -0.012 | 0.957 |
| LEPR    | leptin receptor                                            | -0.009 | 0.960 |
| SLC16A7 | solute carrier family 16 member 7                          | -0.012 | 0.962 |
| ABCC4   | ATP binding cassette subfamily C member 4                  | -0.011 | 0.963 |
| SLC5A3  | solute carrier family 5 member 3                           | -0.009 | 0.967 |
| SLC7A6  | solute carrier family 7 member 6                           | -0.008 | 0.969 |
| SLCO2B1 | solute carrier organic anion transporter family member 2B1 | -0.005 | 0.983 |
| ABCC2   | ATP binding cassette subfamily C member 2                  | -0.003 | 0.988 |
| SLCO1B1 | solute carrier organic anion transporter family member 1B1 | 0.003  | 0.988 |
| SLC2A13 | solute carrier family 2 member 13                          | 0.003  | 0.990 |
| SLC1A2  | solute carrier family 1 member 2                           | 0.001  | 0.995 |

### Inflammatory response

| <u>Symbol</u>    | <u>Description</u>                                      | <u>logFC</u>  | <u>adj.P.Val</u> |
|------------------|---------------------------------------------------------|---------------|------------------|
| <b>TNFSF10</b>   | <b>tumor necrosis factor superfamily member 10</b>      | <b>-0.684</b> | <b>0.001</b>     |
| <b>PDGFRB</b>    | <b>platelet derived growth factor receptor beta</b>     | <b>-0.441</b> | <b>0.015</b>     |
| <b>TNFRSF1A</b>  | <b>TNF receptor superfamily member 1A</b>               | <b>-0.289</b> | <b>0.021</b>     |
| <b>TNFRSF12A</b> | <b>TNF receptor superfamily member 12A</b>              | <b>0.383</b>  | <b>0.028</b>     |
| <b>TNFRSF21</b>  | <b>TNF receptor superfamily member 21</b>               | <b>0.325</b>  | <b>0.031</b>     |
| ITGB4            | integrin subunit beta 4                                 | -0.205        | 0.056            |
| TNFAIP6          | TNF alpha induced protein 6                             | 0.325         | 0.118            |
| PODXL            | podocalyxin like                                        | -0.194        | 0.130            |
| ITGA5            | integrin subunit alpha 5                                | -0.211        | 0.163            |
| ITGA1            | integrin subunit alpha 1                                | -0.150        | 0.188            |
| PTGS2            | prostaglandin-endoperoxide synthase 2                   | 0.187         | 0.189            |
| ITGB5            | integrin subunit beta 5                                 | -0.156        | 0.193            |
| CXCL2            | C-X-C motif chemokine ligand 2                          | 0.171         | 0.231            |
| IKBKB            | inhibitor of nuclear factor kappa B kinase subunit beta | -0.139        | 0.299            |
| SOD1             | superoxide dismutase 1, soluble                         | 0.126         | 0.338            |
| ITGB8            | integrin subunit beta 8                                 | -0.144        | 0.340            |
| NOS1             | nitric oxide synthase 1                                 | 0.114         | 0.366            |
| CCR5             | C-C motif chemokine receptor 5 (gene/pseudogene)        | 0.222         | 0.391            |
| ITGA4            | integrin subunit alpha 4                                | 0.161         | 0.430            |
| CLEC5A           | C-type lectin domain family 5 member A                  | 0.138         | 0.441            |
| ITGA6            | integrin subunit alpha 6                                | -0.092        | 0.442            |
| GRN              | granulin precursor                                      | -0.089        | 0.455            |
| MMP9             | matrix metalloproteinase 9                              | -0.099        | 0.475            |
| NR3C1            | nuclear receptor subfamily 3 group C member 1           | -0.085        | 0.496            |
| CRH              | corticotropin releasing hormone                         | -0.092        | 0.558            |
| AGT              | angiotensinogen                                         | -0.091        | 0.594            |
| PTGDS            | prostaglandin D2 synthase                               | -0.097        | 0.596            |
| NOX4             | NADPH oxidase 4                                         | 0.070         | 0.601            |
| MMP2             | matrix metalloproteinase 2                              | -0.088        | 0.687            |
| SELP             | selectin P                                              | -0.074        | 0.689            |
| IL1RN            | interleukin 1 receptor antagonist                       | 0.060         | 0.692            |
| CXCR3            | C-X-C motif chemokine receptor 3                        | -0.060        | 0.711            |
| F11R             | F11 receptor                                            | -0.089        | 0.741            |
| TNFRSF1B         | TNF receptor superfamily member 1B                      | -0.098        | 0.760            |
| SEMA7A           | semaphorin 7A (John Milton Hagen blood group)           | 0.054         | 0.770            |
| ITGB3            | integrin subunit beta 3                                 | 0.049         | 0.793            |

|        |                                |        |       |
|--------|--------------------------------|--------|-------|
| ITGAV  | integrin subunit alpha V       | -0.033 | 0.837 |
| TLR2   | toll like receptor 2           | 0.030  | 0.860 |
| ITGB1  | integrin subunit beta 1        | 0.026  | 0.880 |
| PTGER3 | prostaglandin E receptor 3     | -0.022 | 0.895 |
| TNF    | tumor necrosis factor          | -0.016 | 0.927 |
| ITGB2  | integrin subunit beta 2        | -0.012 | 0.951 |
| IL1B   | interleukin 1 beta             | -0.033 | 0.967 |
| CCR2   | C-C motif chemokine receptor 2 | -0.007 | 0.970 |
| CD276  | CD276 molecule                 | 0.006  | 0.973 |
| C3     | complement C3                  | -0.001 | 0.997 |

#### Vascular function/coagulation cascade

| <u>Symbol</u>   | <u>Description</u>                                         | <u>logFC</u> | <u>adj.P.Val</u> |
|-----------------|------------------------------------------------------------|--------------|------------------|
| <b>SERPINE2</b> | <b>serpin family E member 2</b>                            | <b>0.461</b> | <b>0.007</b>     |
| <b>PROCR</b>    | <b>protein C receptor</b>                                  | <b>0.240</b> | <b>0.046</b>     |
| PLAT            | plasminogen activator, tissue type                         | -0.242       | 0.051            |
| SERPINE1        | serpin family E member 1                                   | 0.244        | 0.212            |
| PROS1           | protein S (alpha)                                          | -0.165       | 0.262            |
| PROC            | protein C, inactivator of coagulation factors Va and VIIIa | -0.128       | 0.479            |
| CA1             | carbonic anhydrase 1                                       | 0.081        | 0.518            |
| VWF             | von Willebrand factor                                      | -0.139       | 0.567            |
| AVP             | arginine vasopressin                                       | -0.057       | 0.758            |
| SERPINI1        | serpin family I member 1                                   | -0.033       | 0.840            |
| PLG             | plasminogen                                                | -0.030       | 0.884            |
| KNG1            | kininogen 1                                                | -0.024       | 0.898            |
| NOS3            | nitric oxide synthase 3                                    | 0.037        | 0.905            |
| MYLK            | myosin light chain kinase                                  | -0.014       | 0.949            |
| PTAFR           | platelet activating factor receptor                        | -0.013       | 0.952            |
| EPAS1           | endothelial PAS domain protein 1                           | 0.010        | 0.955            |

#### Endothelial proliferation/angiogenesis

| <u>Symbol</u> | <u>Description</u>                                                     | <u>logFC</u> | <u>adj.P.Val</u> |
|---------------|------------------------------------------------------------------------|--------------|------------------|
| PDGFB         | platelet derived growth factor subunit B                               | -0.226       | 0.090            |
| TMEFF2        | transmembrane protein with EGF like and two follistatin like domains 2 | 0.166        | 0.170            |
| S100A12       | S100 calcium binding protein A12                                       | 0.143        | 0.245            |
| FGF19         | fibroblast growth factor 19                                            | -0.157       | 0.354            |
| IGFBP3        | insulin like growth factor binding protein 3                           | 0.091        | 0.486            |
| RGS5          | regulator of G-protein signaling 5                                     | -0.075       | 0.548            |
| FLT1          | fms related tyrosine kinase 1                                          | -0.112       | 0.572            |
| HNRNPDL       | heterogeneous nuclear ribonucleoprotein D like                         | -0.084       | 0.601            |
| VEGFA         | vascular endothelial growth factor A                                   | -0.072       | 0.617            |
| S100B         | S100 calcium binding protein B                                         | -0.071       | 0.643            |
| EZH1          | enhancer of zeste 1 polycomb repressive complex 2 subunit              | -0.068       | 0.722            |
| PTPRB         | protein tyrosine phosphatase, receptor type B                          | -0.057       | 0.745            |
| HMGB1         | high mobility group box 1                                              | 0.044        | 0.775            |
| PTN           | pleiotrophin                                                           | -0.029       | 0.920            |
| KDR           | kinase insert domain receptor                                          | 0.022        | 0.934            |
| BTG2          | BTG anti-proliferation factor 2                                        | 0.012        | 0.958            |
| EPO           | erythropoietin                                                         | -0.011       | 0.963            |

### Other BBB-related genes

| <u>Symbol</u> | <u>Description</u>                               | <u>logFC</u> | <u>adj.P.Val</u> |
|---------------|--------------------------------------------------|--------------|------------------|
| EPHA2         | EPH receptor A2                                  | -0.249       | 0.076            |
| MOG           | myelin oligodendrocyte glycoprotein              | -0.090       | 0.546            |
| CLN3          | CLN3, battenin                                   | -0.085       | 0.566            |
| SRGN          | serglycin                                        | 0.072        | 0.574            |
| MBP           | myelin basic protein                             | -0.066       | 0.646            |
| RAMP2         | receptor activity modifying protein 2            | 0.054        | 0.713            |
| CLCN2         | chloride voltage-gated channel 2                 | -0.055       | 0.733            |
| CPE           | carboxypeptidase E                               | 0.044        | 0.811            |
| CYBB          | cytochrome b-245 beta chain                      | 0.033        | 0.856            |
| MPZL1         | myelin protein zero like 1                       | 0.028        | 0.864            |
| GAB2          | GRB2 associated binding protein 2                | -0.030       | 0.866            |
| MAP3K7        | mitogen-activated protein kinase kinase kinase 7 | 0.028        | 0.882            |
| APP           | amyloid beta precursor protein                   | -0.044       | 0.890            |
| APLP2         | amyloid beta precursor like protein 2            | 0.022        | 0.914            |
| PLP1          | proteolipid protein 1                            | 0.019        | 0.935            |
| HDC           | histidine decarboxylase                          | 0.007        | 0.985            |
| HRH3          | histamine receptor H3                            | 0.003        | 0.989            |
| APOE          | apolipoprotein E                                 | 0.000        | 1.000            |
| GFAP          | glial fibrillary acidic protein                  | 0.000        | 1.000            |
